# Supplementary material
Source: HighWire-hosted journal article supplement (https://jitc.bmj.com/content/8/1/e000104)
Supplement: inline-supplementary-material-1 [file inline-supplementary-material-1.pdf]

# Supplementary:

- Figure 1. IHC of lung pleural biopsy Pre-ICI
- Figure 2. IHC of cervical lymph node Post-ICI
- Figure 3. Scatter plot of rearrangements between different samples.
- Table 1. Next generation sequencing result of lung pleural biopsy specimen.
- Table 2. Calculation of reporting odds ratio (ROR).

**Figure 1. IHC of lung pleural biopsy.**

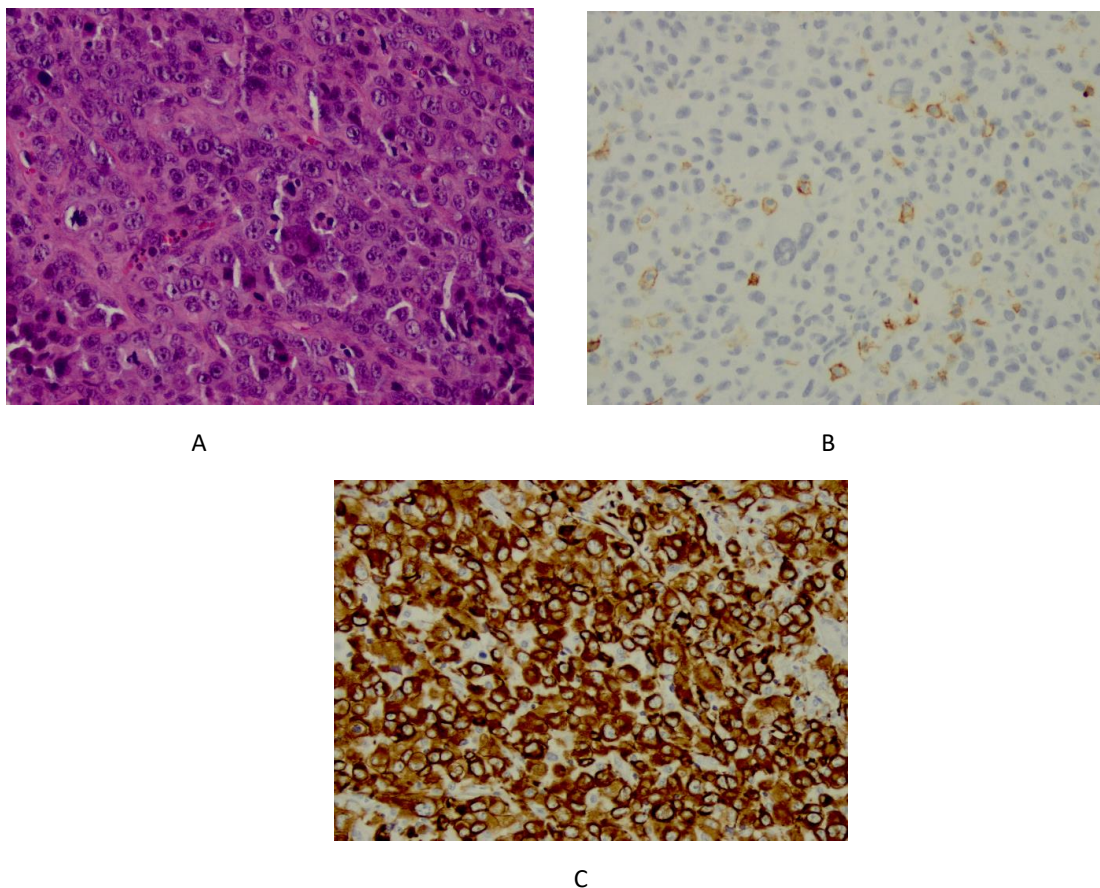

**Figure 1 A. H&E staining of left pleural biopsy specimen. B. CD45 staining negative by IHC.**

**C. CK positive by IHC.**

Figure 2. IHC of cervical lymph node Post-ICI

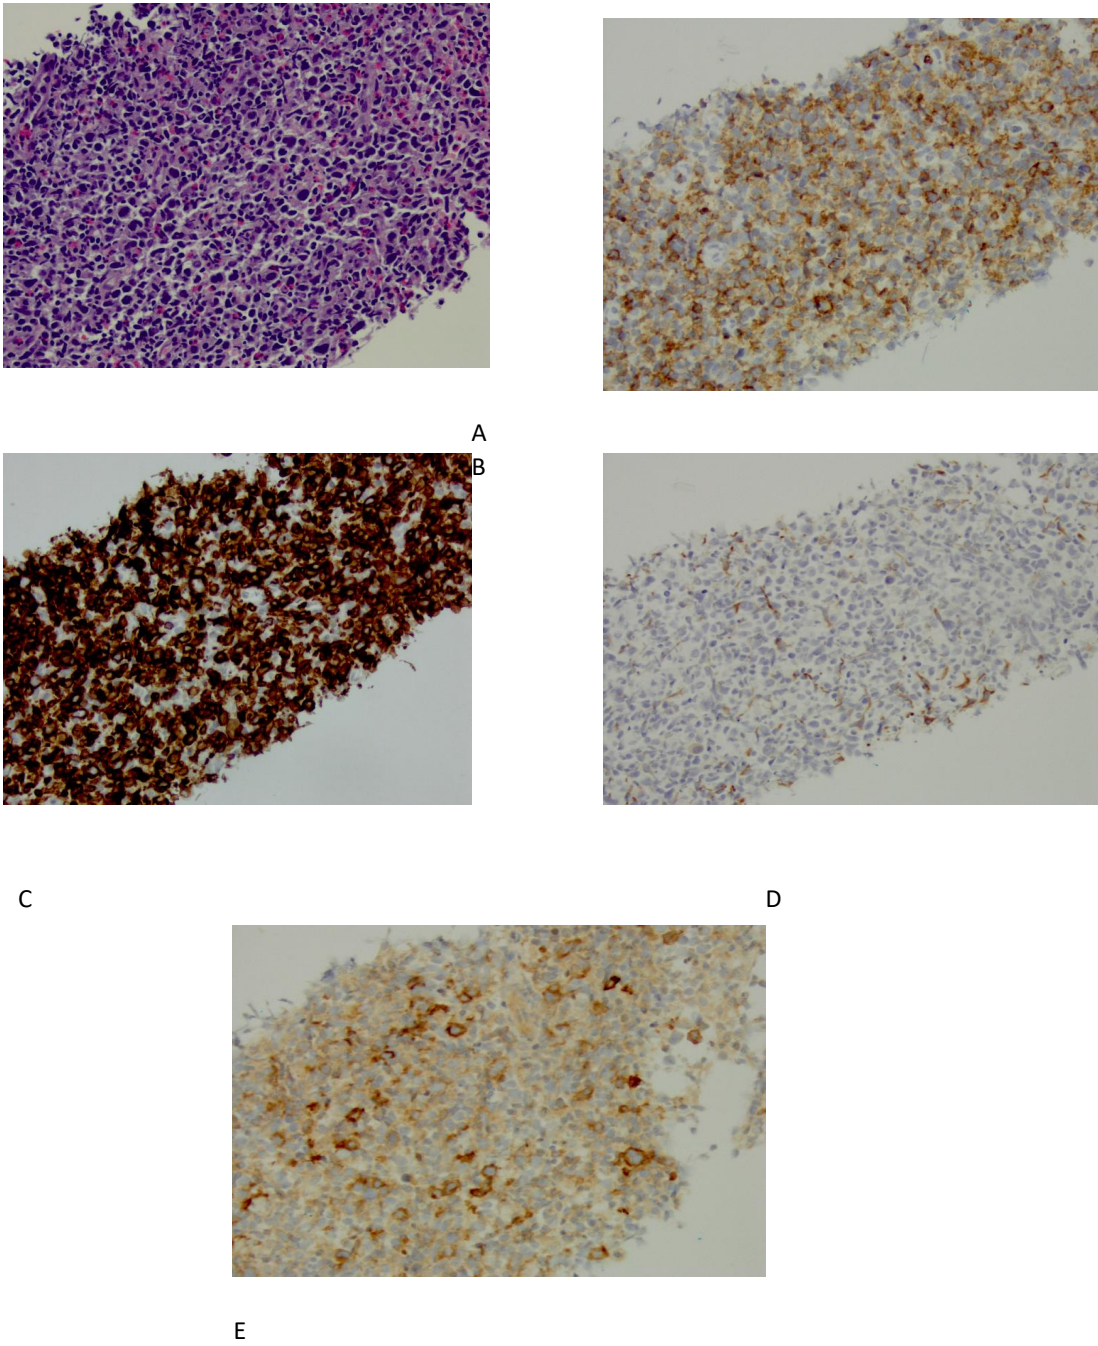

**Figure 2 A. H&E Stain of lymph node B. CD45 positive by IHC. C. CD3 positive by IHC D. CK negative by IHC. E. CD30 positive by IHC.**

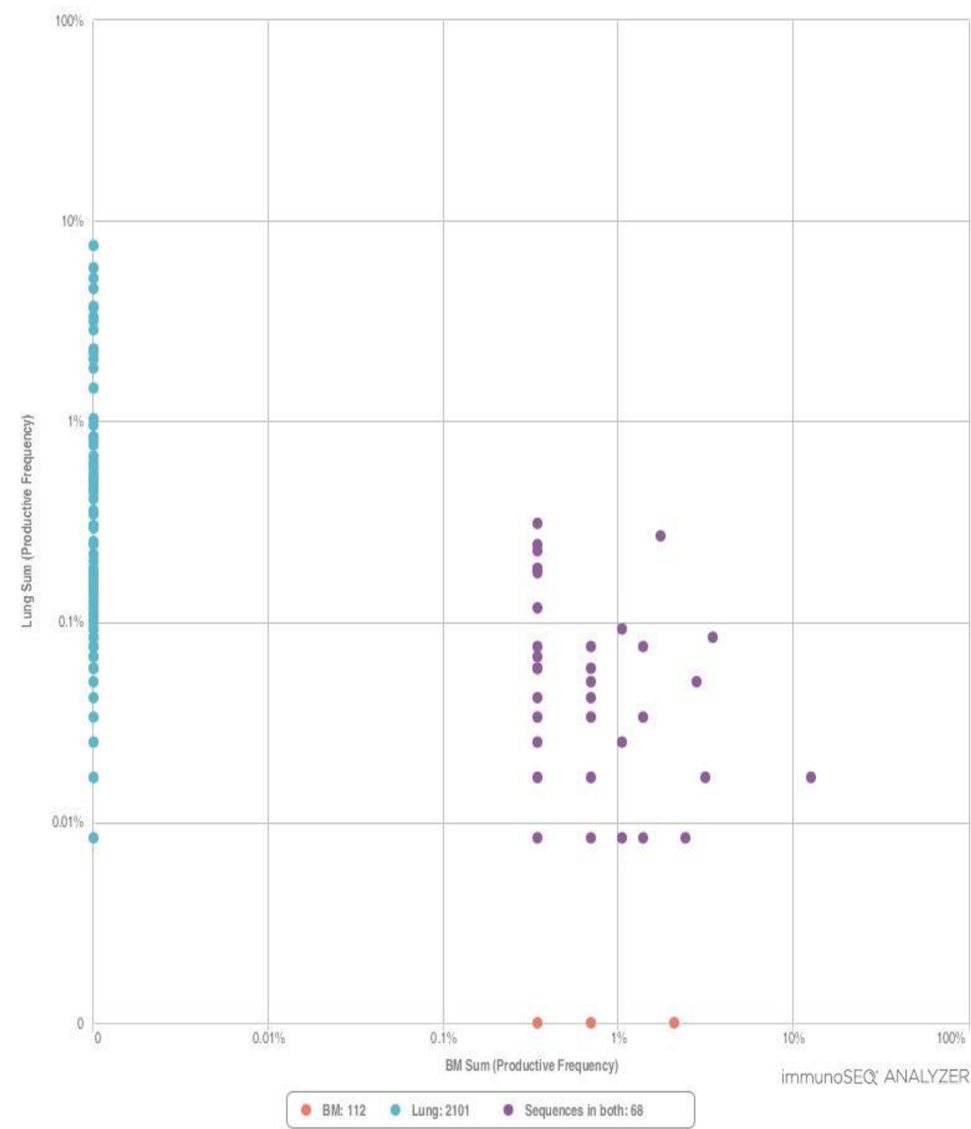

**Figure 3A. Scatter plot of rearrangements by TCRβ sequencing between lung and bone marrow sample.**

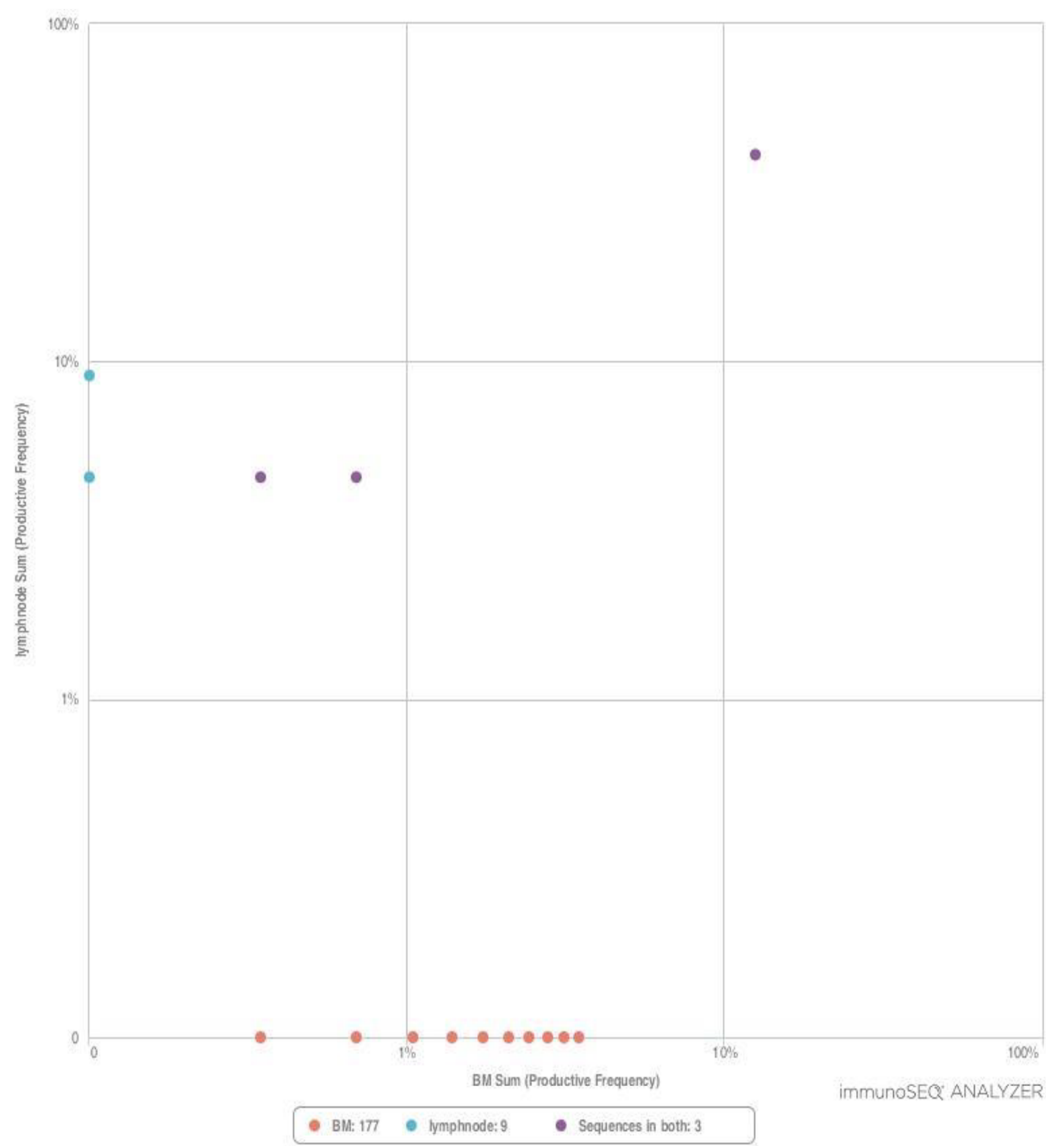

Figure 3B. Scatter plot of rearrangements by TCRβ sequencing between lymph node and bone marrow sample.

**Table 1. Mutations found on NGS on pleural biopsy prior to PD1 inhibitor**

| Mutation | Alteration                 |
|----------|----------------------------|
| TP53     | P71fs                      |
| CIC      | R934W                      |
| ITK      | V587I                      |
| LRP1B    | V4109I<br>G2474S<br>T1043S |
| MECOM    | Q351E                      |
| MYH9     | E1960K                     |
| NKX2-1   | A188fs                     |
| NUMA1    | Y1836H                     |
| NUTM1    | I739T                      |
| RECQL4   | V652M                      |
| RPTOR    | A826T                      |
| SMO      | P641A                      |
| TRIM26   | V136I                      |
| TRIM33   | Q609X                      |

**Table 2. ROR calculation for risk of T-cell lymphoma due to CPI**

|                                                                                         |                         |
|-----------------------------------------------------------------------------------------|-------------------------|
| Total AEs in FAERS from 2012-2018                                                       | 10603289                |
| Total AEs in FAERS for CPIs from 2012-2018<br>(Pembrolizumab, Nivolumab and Ipilimumab) | 50445                   |
| Total AEs for T-cell lymphoma in FAERS from 2012-2018                                   | 1334                    |
| Total AEs for T-cell lymphoma sec to CPIs from 2012-2018                                | 12                      |
| ROR for T-cell lymphoma sec to CPI vs other drugs in database                           | 1.91 (95% CI 1.08-3.37) |
